# Supplementary material for: Gene Similarity Networks Unveil a Potential Novel Unicellular Group Closely Related to Animals from the Tara Oceans Expedition
Source: PubMed Central journal article supplement — Genome Biol Evol. 2020 Jun 13;12(9):1664–78. doi: 10.1093/gbe/evaa117 (PMC7533066; doi:10.1093/gbe/evaa117), 2020-06-13
Supplement: evaa117_supplementary_data.pdf [file evaa117_supplementary_data.pdf]

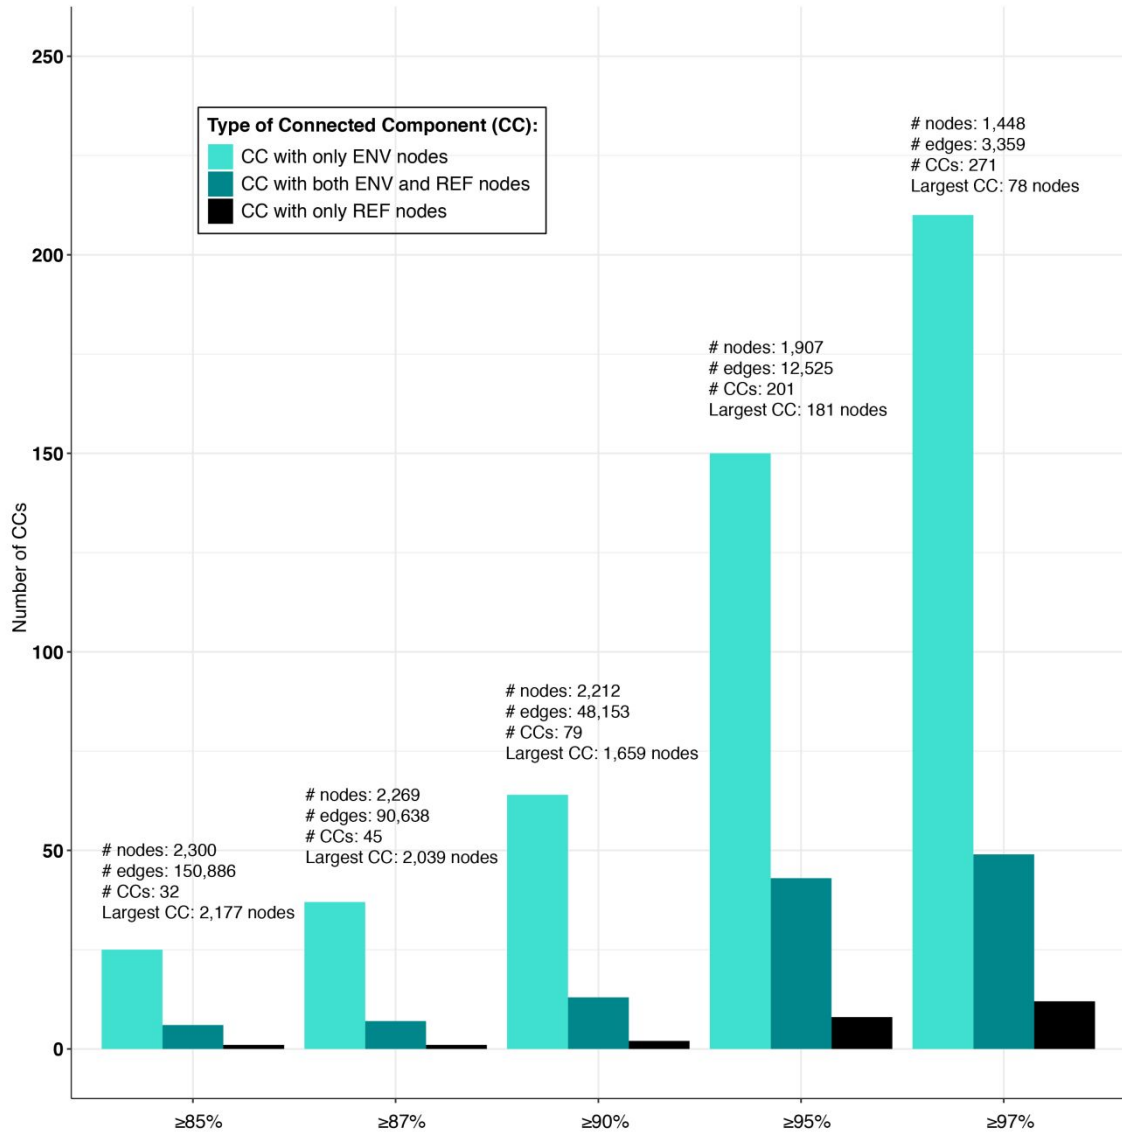

**Supplementary Figure 1**

| BRIDES statistic    | path in the original network | path in the augmented network |
|---------------------|------------------------------|-------------------------------|
| <b>Breakthrough</b> | impossible                   | possible                      |
| <b>Roadblock</b>    | possible                     | impossible                    |
| <b>Impasse</b>      | impossible                   | impossible                    |
| <b>Detour</b>       | shorter distance             | longer distance               |
| <b>Equal</b>        | equal distance               | equal distance                |
| <b>Shortcut</b>     | longer distance              | shorter distance              |

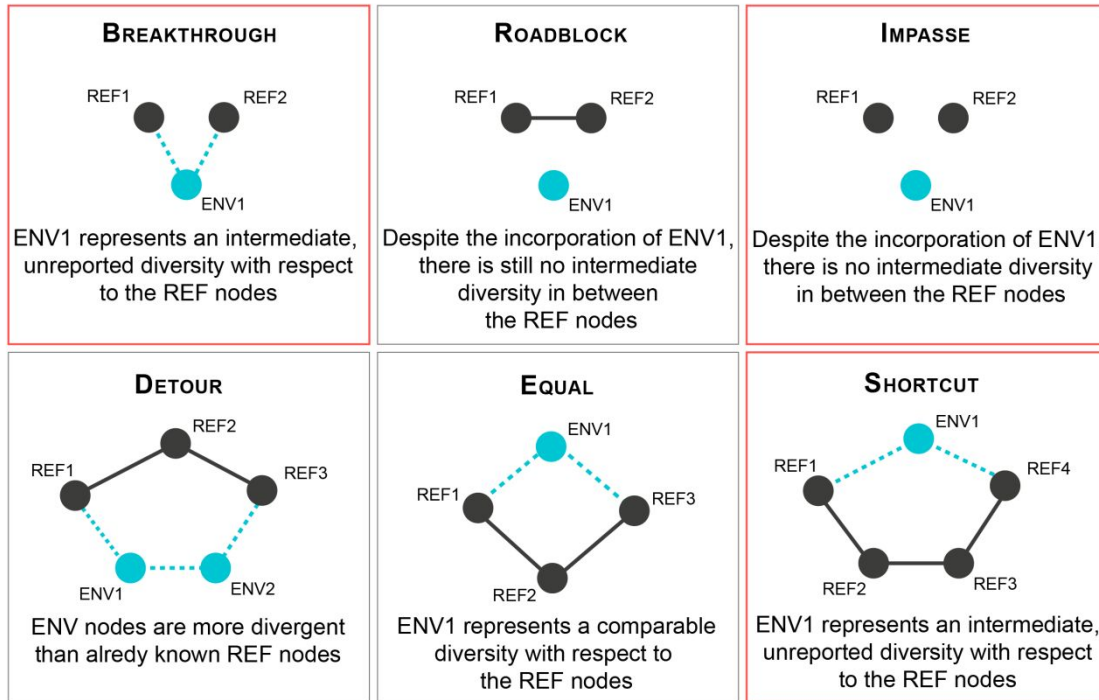

**Supplementary Figure 2**

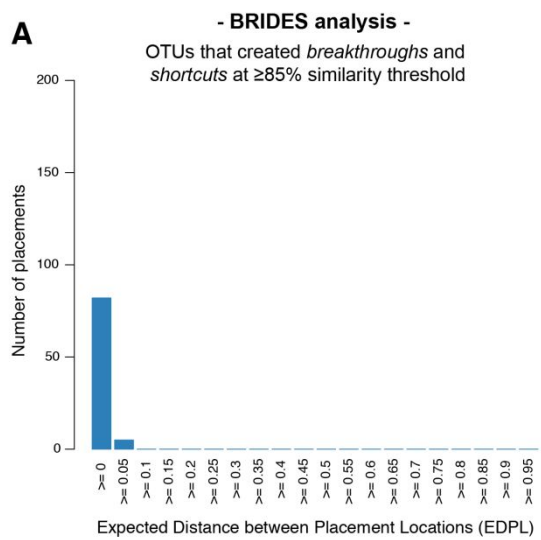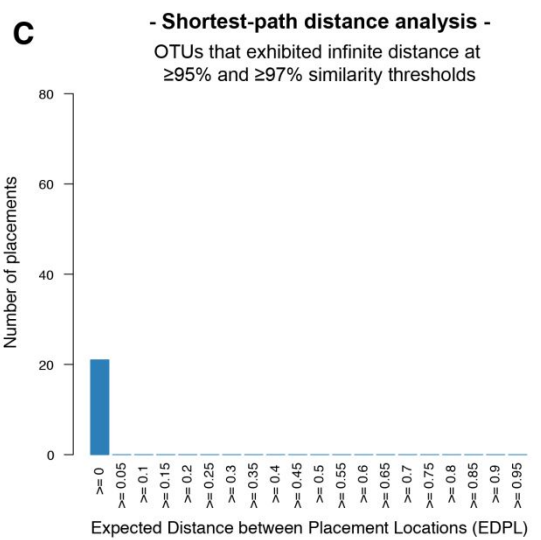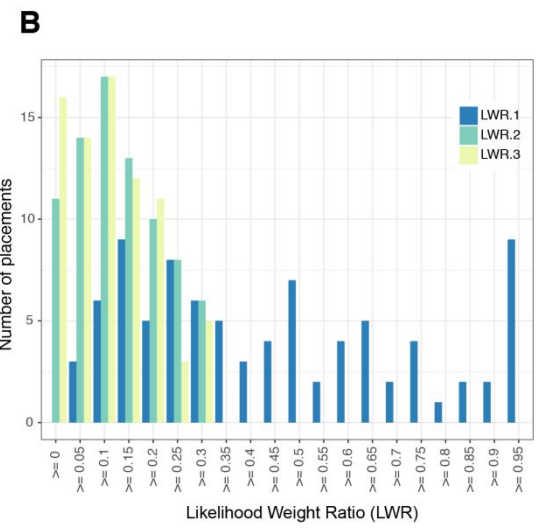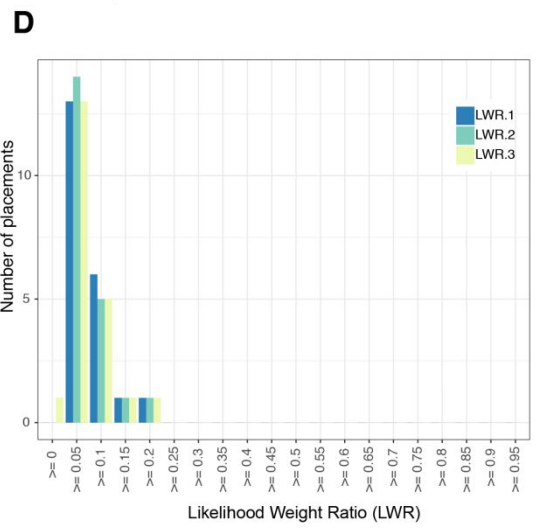

Supplementary Figure 3

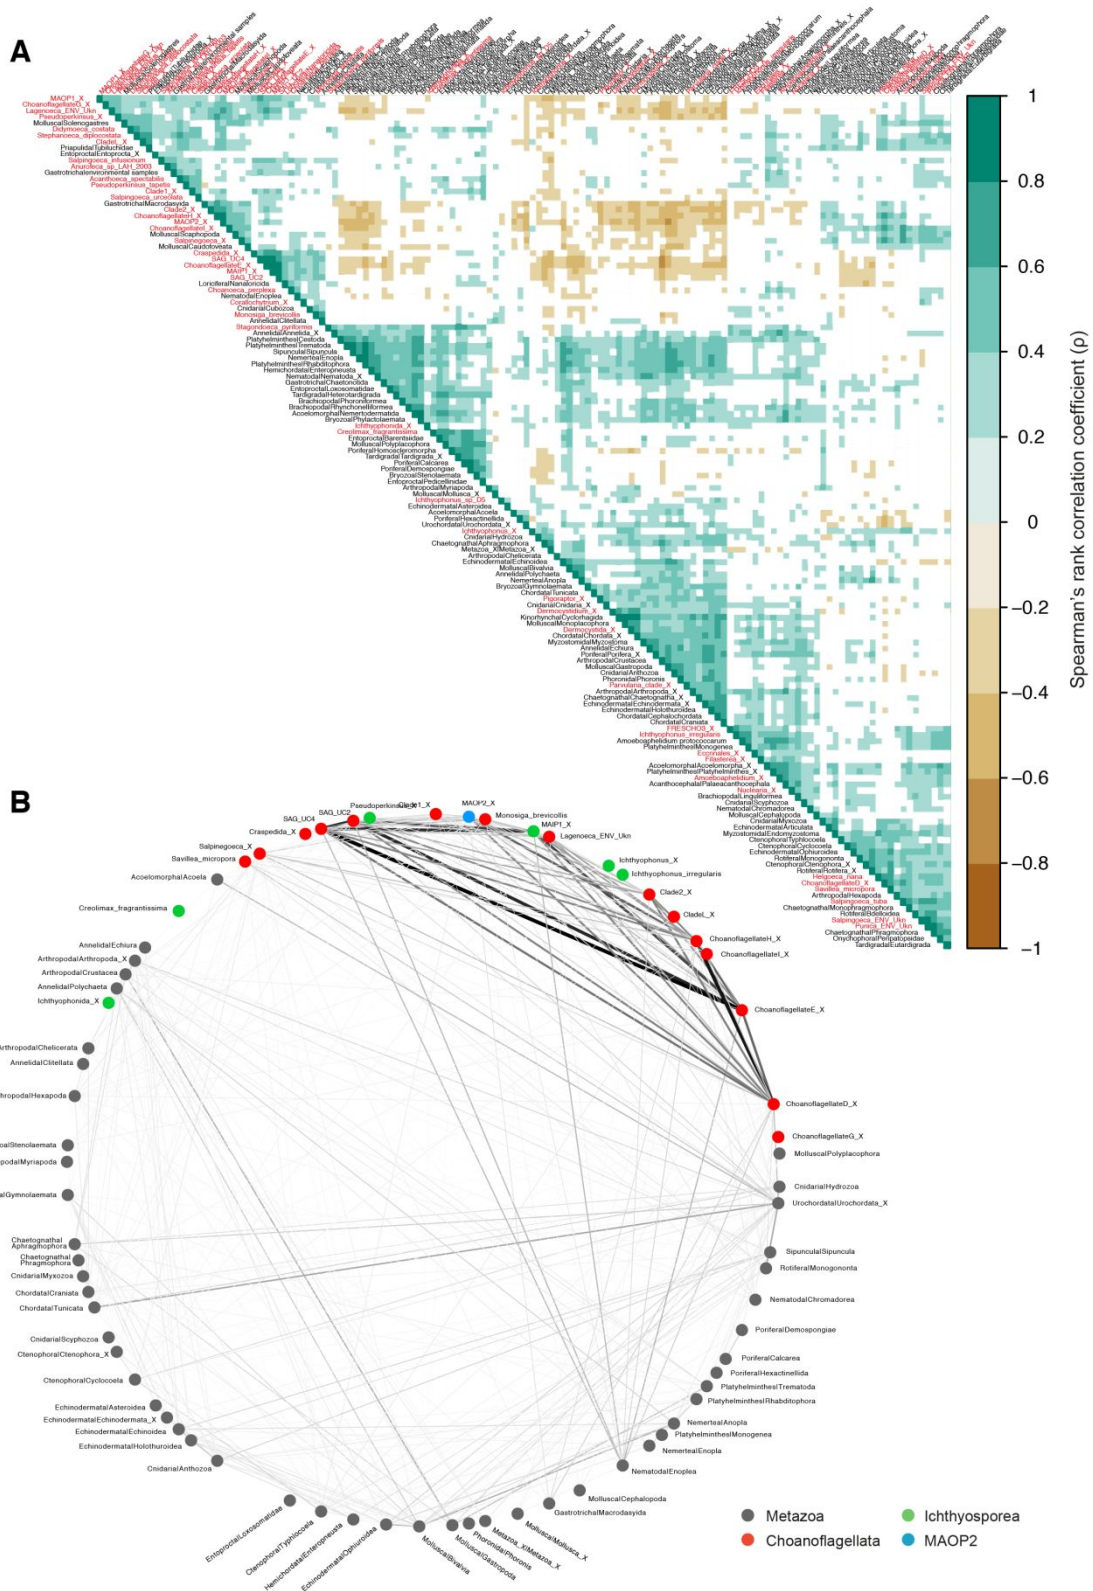

Supplementary Figure 4
